# Supplementary material for: Administration of an Immune Stimulant during the Transition Period Improved Lipid Metabolism and Rumination without Affecting Inflammatory Status
Source: MDPI journal article supplement (doi:10.3390/ani9090619), 2019-08-28
Supplement: s1 [file s1]

**Supplementary File 1.** Intra- and inter-assay coefficient of variations, limit of quantification (LOQ), codes of commercial kits used, references for their validation in the bovine plasma, calibrators and quality controls used for plasma parameters included in the study.

| Parameter            | Inter | Intra | LOQ   | Kit                                       | Reference | Calibrator                                        | Quality control                                                               |
|----------------------|-------|-------|-------|-------------------------------------------|-----------|---------------------------------------------------|-------------------------------------------------------------------------------|
| Glucose              | 0.75  | 1.33  | 0.10  | 0018250840 <sup>1</sup>                   | -         |                                                   |                                                                               |
| Cholesterol          | 1.38  | 1.56  | 0.10  | 0018250540 <sup>1</sup>                   | -         |                                                   |                                                                               |
| Urea                 | 1.23  | 1.14  | 0.01  | 0018255440 <sup>1</sup>                   | -         |                                                   |                                                                               |
| Calcium              | 1.86  | 0.93  | 0.20  | 0018250340 <sup>1</sup>                   | -         | Homemade bovine standard                          |                                                                               |
| Phosphorus           | 0.73  | 1.64  | 0.01  | 0018251240 <sup>1</sup>                   | -         |                                                   |                                                                               |
| Magnesium            | 1.65  | 1.00  | 0.02  | 0018259240 <sup>1</sup>                   | -         |                                                   |                                                                               |
| Total proteins       | 2.87  | 1.07  | 10.00 | 0018251440 <sup>1</sup>                   | -         |                                                   |                                                                               |
| Albumins             | 3.41  | 1.20  | 16.00 | 0018250040 <sup>1</sup>                   | -         |                                                   |                                                                               |
| Creatinine           | 3.09  | 1.09  | 18.00 | 0018255540 <sup>1</sup>                   | -         |                                                   |                                                                               |
| Sodium               | 1.53  | 0.62  | 50.00 | ISE Diluent,                              | -         | ISE low calibrator,                               |                                                                               |
| Potassium            | 1.11  | 0.63  | 1.46  | 0018253400 <sup>1</sup> ;                 | -         | 0018469200 <sup>1</sup> ;                         |                                                                               |
| Chlorine             | 0.77  | 0.34  | 70.00 | ISE Reference,                            | -         | ISE high calibrator,                              |                                                                               |
|                      |       |       |       | 0018253500 <sup>1</sup>                   | -         | 0018469300 <sup>1</sup>                           |                                                                               |
| Zinc                 | 3.83  | 1.76  | 0.500 | 439-14906 <sup>2</sup>                    | -         | Bov Asy Control 2 <sup>4</sup>                    | Homemade bovine standard;                                                     |
| Ceruloplasmin        | 3.57  | 1.39  | 0.100 | -                                         | [63]      | Human plasma ceruloplasmin, A50143H <sup>6</sup>  | SeraChem Control Level 1, 0018162412 <sup>1</sup> ;                           |
| AST / GOT            | 3.55  | 1.78  | 1.00  | 0018257540 <sup>1</sup>                   | -         | No calibration is required                        | Bov Asy Control 2, AN1026 <sup>3</sup>                                        |
| GGT                  | 4.42  | 2.27  | 2.00  | 0018257640 <sup>1</sup>                   | -         |                                                   |                                                                               |
| Paraoxonase          | 4.60  | 1.38  | 1.20  | -                                         | [64]      |                                                   |                                                                               |
| Haptoglobin          | 3.50  | 3.64  | 0.01  | -                                         | [65]      |                                                   |                                                                               |
| Total Bilirubin      | 2.46  | 3.11  | 2.00  | 0018254640 <sup>1</sup>                   | -         | Bov Asy Control 2 <sup>4</sup>                    |                                                                               |
| Alkaline phosphatase | 3.52  | 0.77  | 2.00  | 0018259640 <sup>1</sup>                   | -         | ReferrIL E, 0018256300 <sup>1</sup>               |                                                                               |
| NEFA                 | 5.00  | 2.27  | 0.010 | NEFA-HR(2) R1 Set, 434-91795 <sup>2</sup> | -         | NEFA standard, 270-77000 <sup>2</sup>             |                                                                               |
| BHB                  | 3.42  | 0.82  | 0.100 | RB1007 <sup>3</sup>                       | -         | BHB standard included in the kit                  |                                                                               |
| AOPP                 | 10.93 | 0.42  | 10.00 | -                                         | [33]      | Chloramine T trihydrate, 31224-250G <sup>10</sup> |                                                                               |
| ROMt                 | 2.93  | 1.40  | 3.20  | MC003 <sup>4</sup>                        | -         | Calibrator d-ROMs, MC.030 <sup>9</sup>            | Homemade bovine standard SeraChem Control Level 1, 0018162412 <sup>1</sup> ;  |
| FRAP antioxidants    | 3.15  | 3.13  | 30.00 | -                                         | [59]      | TROLOX, 238813-1G <sup>8</sup>                    | Control Serum, MC031 <sup>4</sup> ;                                           |
| D-lactic acid        | 2.30  | 1.20  | 0,214 | K-DLATE <sup>5</sup>                      | -         | No calibration is required                        | Calibrator d-ROMs, MC030 <sup>4</sup>                                         |
| L-lactic Acid        | 2.10  | 1.20  | 0,214 |                                           | -         |                                                   | Homemade bovine standard; SeraChem Control Level 1, 0018162412 <sup>1</sup> ; |
| NO2                  | 7.55  | 1.58  | 1.20  | -                                         | [66,67]   | NaNO2, 481827 <sup>9</sup>                        | Bov Asy Control 2, AN1026 <sup>3</sup> ;                                      |
| NOx                  | 7.32  | 1.68  | 8.00  |                                           |           |                                                   | TROLOX, 238813-1G <sup>8</sup>                                                |
|                      |       |       |       |                                           |           |                                                   | D-/L- Lactic acid standard included in the kit                                |
|                      |       |       |       |                                           |           |                                                   | Homemade bovine standard;                                                     |

|                 |       |      |       |                      |      |                                          |                                                                                                                                                                                         |
|-----------------|-------|------|-------|----------------------|------|------------------------------------------|-----------------------------------------------------------------------------------------------------------------------------------------------------------------------------------------|
| Myeloperoxidase | 8.60  | 1.83 | 10.00 | -                    | [32] | No calibration is required               | SeraChem Control Level 1, 0018162412 <sup>1</sup> ; Bov Asy Control 2, AN1026 <sup>3</sup> ; NaNO2 solution Homemade bovine standard; SeraChem Control Level 1, 0018162412 <sup>1</sup> |
| IL6             | 15.57 | 8.60 | 78.00 | ESS0029 <sup>7</sup> | -    | Bovine IL6 standard included in the kit  | Homemade bovine standard                                                                                                                                                                |
| IL1B            | 16.20 | 5.90 | 15.00 | ESS0027 <sup>7</sup> | -    | Bovine IL1B standard included in the kit |                                                                                                                                                                                         |

<sup>1</sup>Instrumentation Laboratory Werfen, Milano, Italy. <sup>2</sup>Wako Chemicals GmbH, Neuss, Germany. <sup>3</sup>Randox Laboratories Ltd., Crumlin, County Antrim, UK. <sup>4</sup>Diacron International S.r.l., Grosseto, Italy. <sup>5</sup>Megazyme, Wicklow, Ireland. <sup>6</sup>Meridian Life Science, Memphis, USA. <sup>7</sup>Thermo Scientific, Frederick, MD 2174, USA. <sup>8</sup>Sigma-Aldrich Chemie GmbH, Steinheim, Germany. <sup>9</sup>Carlo Erba, Rodano, Milano, Italy. <sup>10</sup>Sigma Aldrich, St. Louis, MO63103 USA.

**Supplementary file 2.** Trends of body weight (BW) and body condition score (BCS) in control dairy cows (n = 5) or cows receiving 65 g\*d-1 of Omnigen-AF® as top-dress between -55 and 42 days from calving (n = 5).

| Item, Unit          | TRT <sup>1</sup> | Days from calving |       |       |       |       |       |       |       | P-Value          |                |                      |
|---------------------|------------------|-------------------|-------|-------|-------|-------|-------|-------|-------|------------------|----------------|----------------------|
|                     |                  | -65               | -45   | -21   | 1     | 14    | 21    | 28    | 45    | TRT <sup>1</sup> | t <sup>3</sup> | TRT X t <sup>4</sup> |
| BW, kg              | CTR              | 644.6             | 649.8 | 683.6 | 630.6 | 587.6 | 582.2 | 582.9 | 585.9 | 0.96             | <0.01          | 0.99                 |
|                     | IMS              | 638.2             | 643.2 | 679.0 | 631.4 | 593.5 | 585.4 | 583.8 | 578.5 |                  |                |                      |
| BCS,                | CTR              | 2.55              | 2.54  | 2.56  | 2.51  | 2.28  | 2.20  | 2.19  | 2.15  | 0.54             | <0.01          | 0.88                 |
| -                   | IMS              | 2.41              | 2.43  | 2.45  | 2.44  | 2.26  | 2.13  | 2.13  | 2.04  |                  |                |                      |
| ΔBCS <sup>2</sup> , | CTR              |                   |       |       | 0.32  |       |       |       |       | 0.94             | -              | -                    |
| -                   | IMS              |                   |       |       | 0.31  |       |       |       |       |                  |                |                      |

<sup>1</sup>Treatment (CTR is control cows; IMS is cows receiving a topdressing of the feeds with the immunostimulant. <sup>2</sup>Difference between BCS value at calving and 28 DFC. <sup>3</sup>Time. <sup>4</sup>Treatment X time interaction effect.

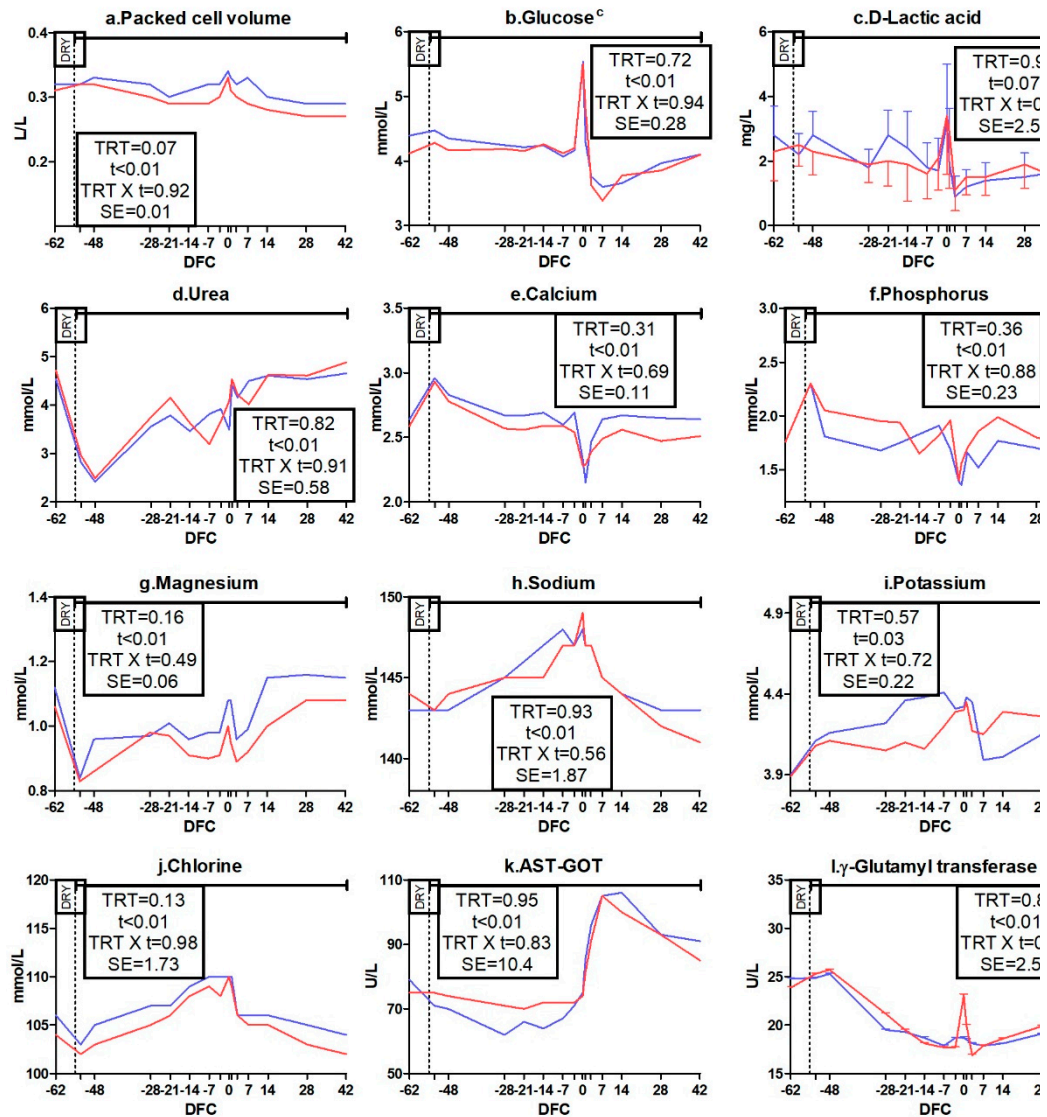

**Supplementary file 3.** Time course of packed cell volume (a) and plasma concentrations of glucose (b), D-lactic acid (c), urea (d), calcium (e), phosphorus (f), magnesium (g), sodium (h), potassium (i), chlorine (j), aspartate aminotransferase – glutamate oxaloacetate transaminase (AST-GOT; k) and  $\gamma$ -glutamyl transferase (l) in control dairy cows (CTR; blue line, n = 5) and cows receiving 65 g\*d<sup>-1</sup> of Omnigen-AF as top-dress (IMS; red line, n = 5) between -55 and 42 days from calving. Upper solid line indicates timing of treatment administration. TRT is treatment effect; t is time effect; TRT X t is the treatment X time interaction effect. DFC is days from calving; DRY is dry-off day (-55 days from expected calving). SE is standard error. <sup>c</sup>Parameter was covariate on -62 values.

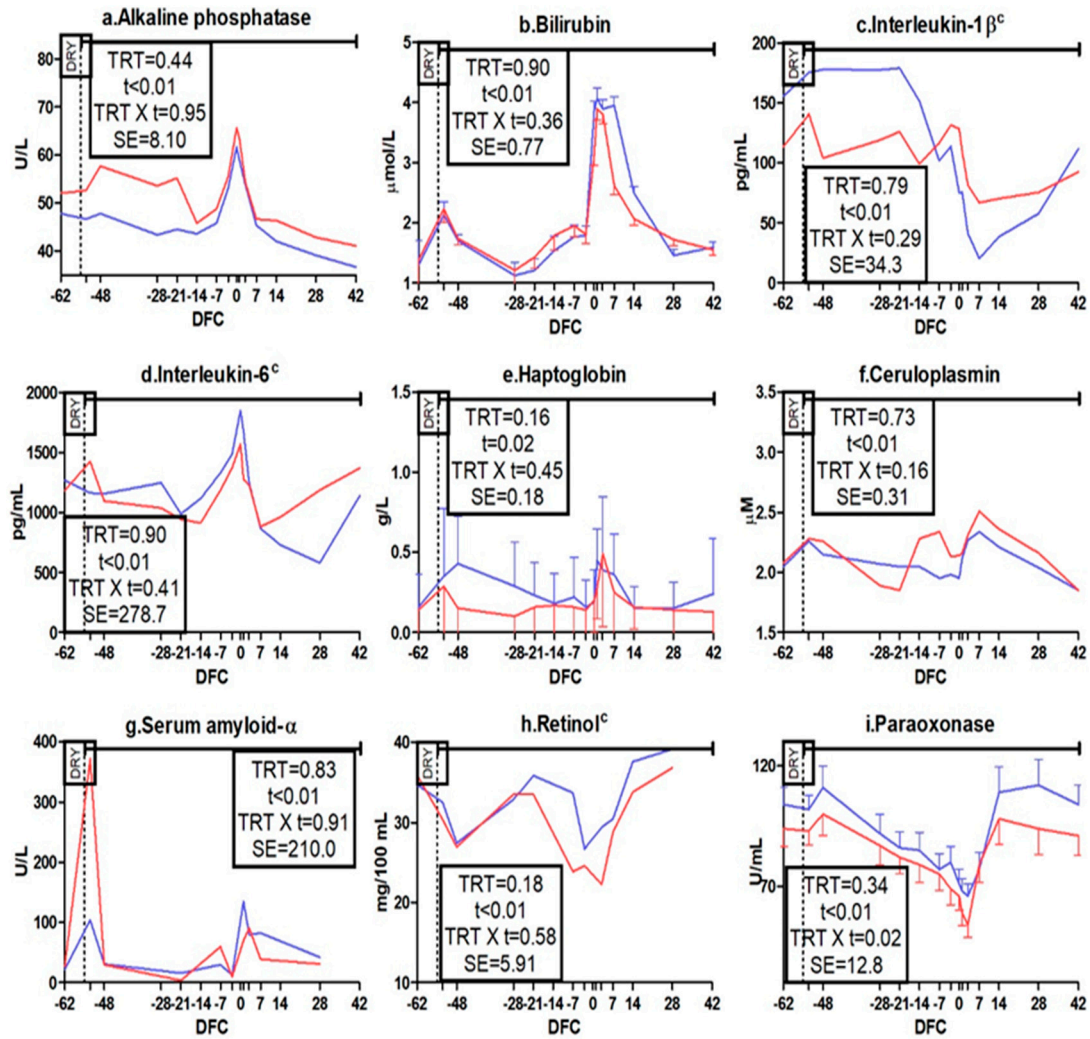

**Supplementary file 4.** Time course of plasma concentrations of alkaline phosphatase (a), bilirubin (b), interleukin-1 beta (c), interleukin-6 (d), haptoglobin (e), ceruloplasmin (f), serum amyloid- $\alpha$  (g), retinol (h) and paraoxonase (i) in control dairy cows (CTR; blue line,  $n = 5$ ) and cows receiving 65 g\*d<sup>-1</sup> of Omnigen-AF as top-dress (IMS; red line,  $n = 5$ ) between -55 and 42 days from calving. Upper solid line indicates timing of treatment administration. TRT is treatment effect;  $t$  is time effect; TRT X  $t$  is the treatment X time interaction effect. DFC is days from calving; DRY is dry-off day (-55 days from expected calving). SE is standard error. <sup>c</sup>Parameter was covariate on -62 values.

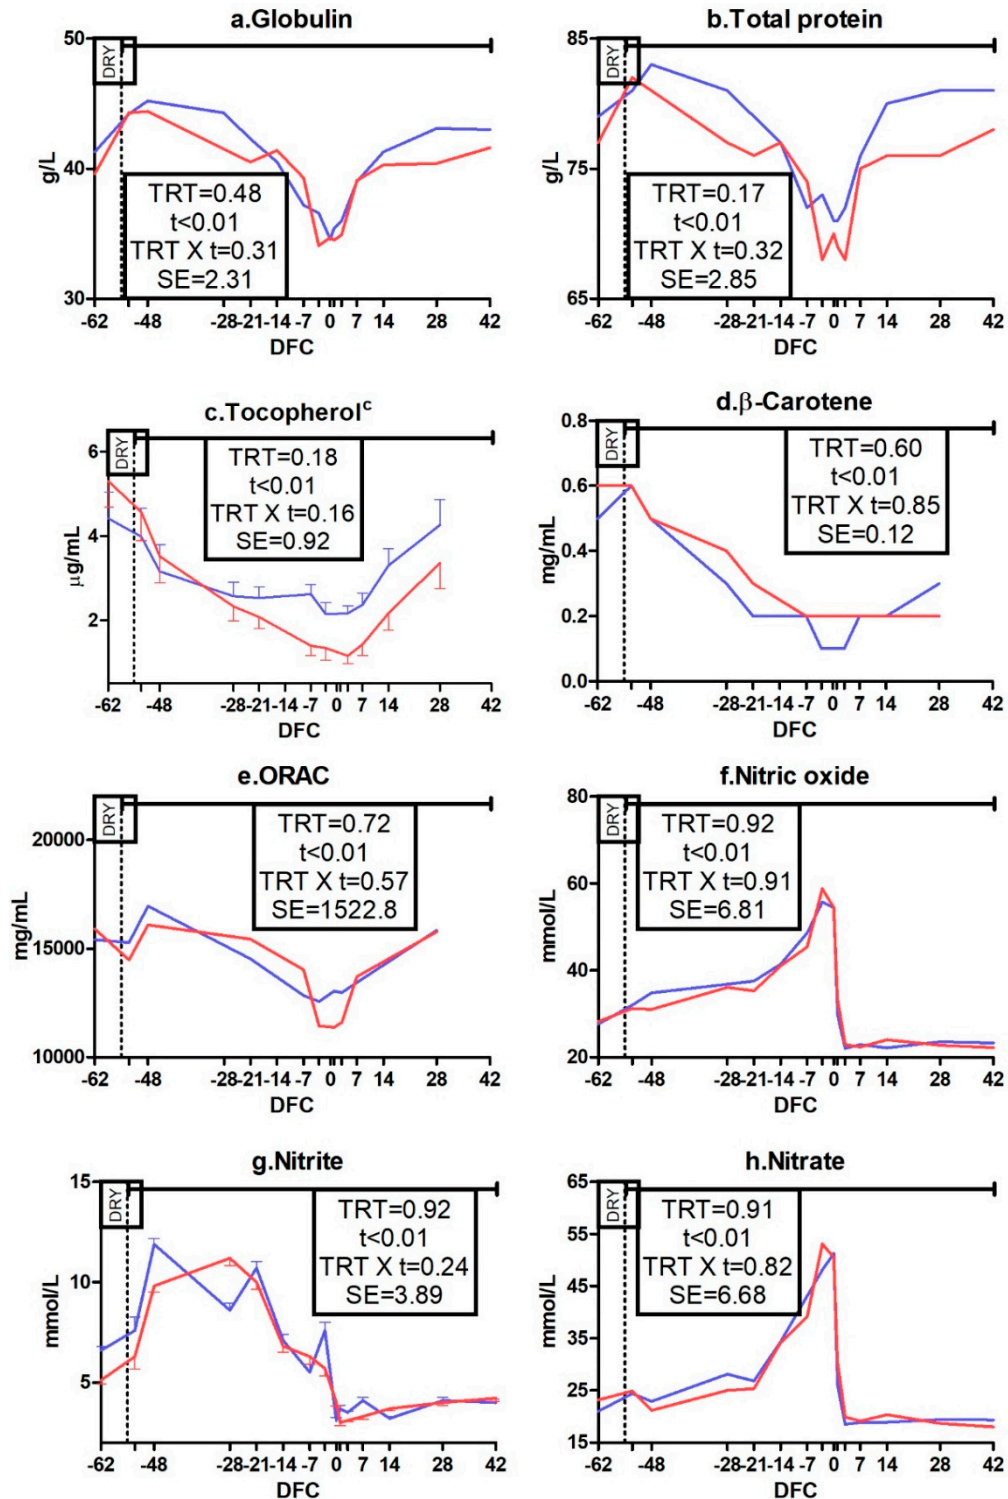

**Supplementary file 5.** Time course of plasma concentrations of globulin (a), total protein (b), tocopherol (c),  $\beta$ -carotene (d), oxygen reactive antioxidant capacity (ORAC; e), nitric oxide (f), nitrite (g) and nitrate (h) in control dairy cows (CTR; solid line,  $n = 5$ ) and cows receiving 65 g\*d<sup>-1</sup> of Omnigen-AF as top-dress (IMS; dotted line,  $n = 5$ ) between -55 and 42 days from calving. Upper solid line indicates timing of treatment administration. TRT is treatment effect;  $t$  is time effect; TRT X  $t$  is the treatment X time interaction effect. DFC is days from calving; DRY is dry-off day (-55 days from expected calving). SE is standard error; <sup>c</sup>Parameter was covariate on -62 values.

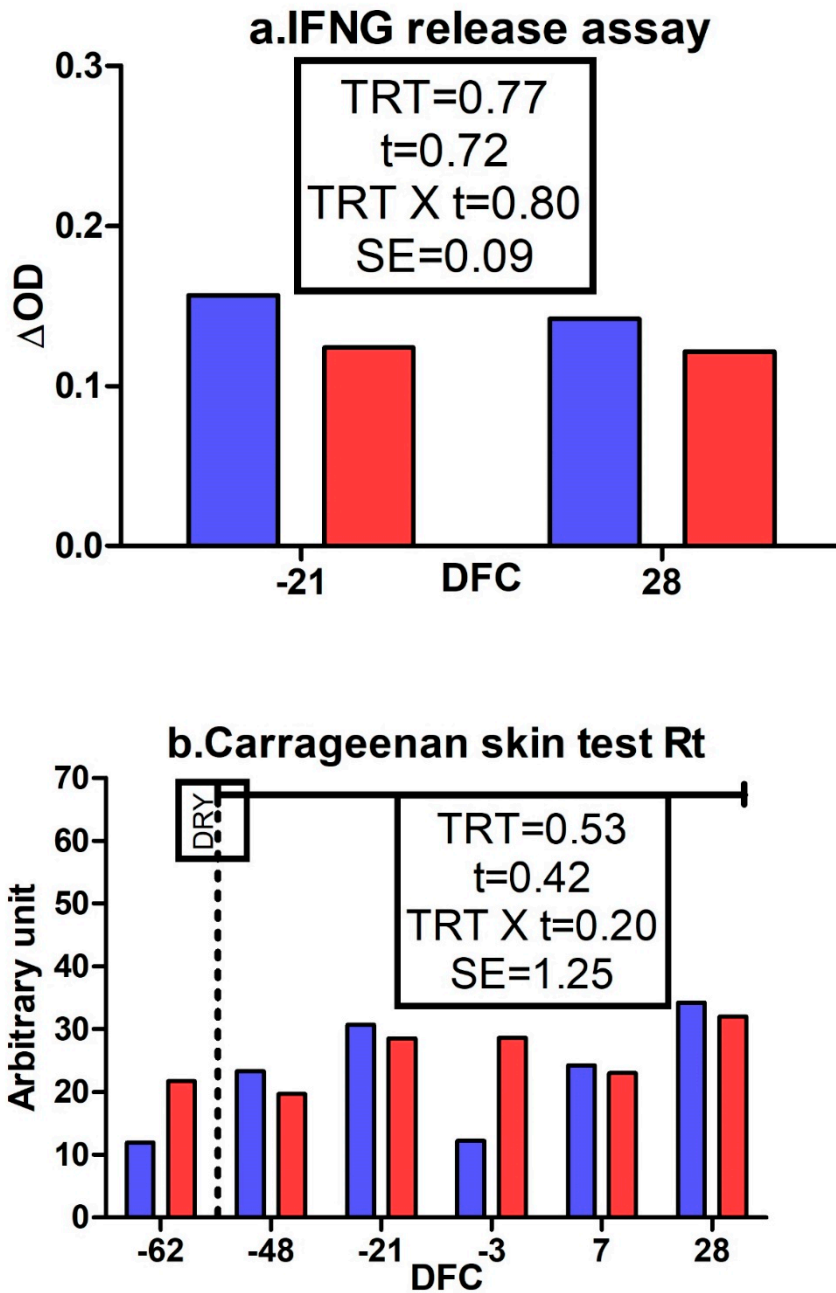

**Supplementary file 6.** Optical density difference ( $\Delta OD$ ) between avian PPD-stimulated and control wells in the interferon gamma (IFNG) release assay (a) and total peripheral response (Rt) after the carrageenan skin test (b) in control dairy cows (CTR; blue bars,  $n = 5$ ) and cows receiving 65 g\*d-1 of Omnigen-AF® as top-dress (IMS; red bars,  $n = 5$ ) between -55 and 42 days from calving. Upper solid line indicates timing of treatment administration. TRT is treatment effect;  $t$  is time effect; TRT X  $t$  is the treatment X time interaction effect. DFC is days from calving; DRY is dry-off day (-55 days from expected calving). SE is standard error.
